# Supplementary material for: Development of a PNA–DiSc2 based portable absorbance platform for the detection of pathogen nucleic acids
Source: Royal Society of Chemistry journal article supplement (doi:10.1039/d2an01351g), 2022-01-01
Supplement: d2an01351g1.pdf [file d2an01351g1.pdf]

## Supplementary information

The following table (**Table 1**) compares the performance of our platform with those portable colorimetric devices that have been used to detect nucleic acids. Most reported devices employ a smartphone or a digital camera to capture the color change. These images are then analysed using a separate software. The application software for capturing images in digital cameras do not allow a lot of flexibility for a user to set the same imaging parameters every time. This may result in inconsistent images. To avoid this problem a user needs to do an internal calibration every time, which may increase the complexity of the process. In contrast, our platform detects a voltage using a photodiode. Duy et al [3] reported an integrated light-to-frequency converter to detect RNA. Our platform has a ten-fold higher sensitivity compared to the that reported by Duy et al.

| Reference                   | Analyte                           | Detector                     | Detection limit    | Specificity                     | Time taken (min) | Cost (USD) | Tested clinical samples? |
|-----------------------------|-----------------------------------|------------------------------|--------------------|---------------------------------|------------------|------------|--------------------------|
| Papadakis et al. (2022) [1] | Influenza A, N gene of SARS-CoV-2 | Digital camera               | 5 copies           | 100%                            | 120              | 1200       | Yes                      |
| Luka et al (2021) [2]       | Cryptosporidium RNA               | Smartphone Camera            | $5 \times 10^3$ nM | -                               | 30               | -          | No                       |
| Duy et al (2012) [3]        | rRNA                              | Light-to-frequency converter | 100 nM             | 100 % (upon nuclease digestion) | -                | -          | No                       |
| <b>PortAbs (Our work)</b>   | <b>SARS-CoV-2</b>                 | <b>Photodiode</b>            | <b>10 nM</b>       | <b>100%</b>                     | <b>90</b>        | <b>500</b> | <b>Yes</b>               |

**Table 1.** Comparison among different portable colorimetric devices and our reported technology

### References

- [1] G. Papadakis *et al.*, “Portable real-time colorimetric LAMP-device for rapid quantitative detection of nucleic acids in crude samples,” *Sci Rep*, vol. 12, no. 1, Dec. 2022, doi: 10.1038/s41598-022-06632-7.
- [2] G. S. Luka, E. Nowak, Q. R. Toyata, N. Tasnim, H. Najjaran, and M. Hoorfar, “Portable on-chip colorimetric biosensing platform integrated with a smartphone for label/PCR-free detection of Cryptosporidium RNA,” *Sci Rep*, vol. 11, no. 1, Dec. 2021, doi: 10.1038/s41598-021-02580-w.
- [3] J. Duy, R. L. Smith, S. D. Collins, and L. B. Connell, “A field-deployable colorimetric bioassay for the rapid and specific detection of ribosomal RNA,” *Biosens Bioelectron*, vol. 52, pp. 433–437, Feb. 2014, doi: 10.1016/j.bios.2012.05.039.
